# Supplementary material for: Identifying Quantitative Trait Loci and Candidate Genes Conferring Resistance to Soybean Mosaic Virus SC7 by Quantitative Trait Loci-Sequencing in Soybean
Source: Front Plant Sci. 2022 Feb 28;13:843633. doi: 10.3389/fpls.2022.843633 (PMC8919070; doi:10.3389/fpls.2022.843633)
Supplement: Supplementary file 3 [file Table_3.XLSX]

## Sheet: Sheet1
Supplementary Table 3. Detailed information on the DNA polymorphisms in the 207-kb candidate mapping region
Mutation style	Gene ID	Pos	Pos	DN50	XQD
stopgain	Glyma.11G028900	2090498	2090498	C	T
nonsynonymous SNV	Glyma.11G028900	2090607	2090607	C	G
nonsynonymous SNV	Glyma.11G028900	2090648	2090648	G	A
nonsynonymous SNV	Glyma.11G028900	2090789	2090789	A	T
nonsynonymous SNV	Glyma.11G028900	2091021	2091021	G	C
nonsynonymous SNV	Glyma.11G028900	2091180	2091180	G	T
nonsynonymous SNV	Glyma.11G028900	2091231	2091231	T	C
nonsynonymous SNV	Glyma.11G028900	2091249	2091249	C	T
nonsynonymous SNV	Glyma.11G028900	2091363	2091363	T	C
nonsynonymous SNV	Glyma.11G028900	2091423	2091423	C	G
nonsynonymous SNV	Glyma.11G028900	2091473	2091473	C	A
nonsynonymous SNV	Glyma.11G028900	2091491	2091491	G	A
nonsynonymous SNV	Glyma.11G028900	2091515	2091515	T	C
frameshift deletion	Glyma.11G028900	2090355	2090356	AT	-
frameshift insertion	Glyma.11G028900	2090622	2090622	-	CATG
frameshift deletion	Glyma.11G028900	2091079	2091080	GT	-
frameshift deletion	Glyma.11G028900	2091100	2091100	T	-
nonframeshift deletion	Glyma.11G028900	2091207	2091221	TGTTGCTGATGGGTC	-
nonsynonymous SNV	Glyma.11G029500	2134524	2134524	G	T
nonsynonymous SNV	Glyma.11G029800	2160217	2160217	G	A
nonsynonymous SNV	Glyma.11G029800	2160232	2160232	T	G
nonsynonymous SNV	Glyma.11G029800	2160242	2160242	C	A
frameshift deletion	Glyma.11G029900	2163830	2163830	C	-
nonsynonymous SNV	Glyma.11G029900	2163507	2163507	G	C
nonsynonymous SNV	Glyma.11G029900	2163551	2163551	A	G
nonsynonymous SNV	Glyma.11G029900	2163784	2163784	G	A
nonsynonymous SNV	Glyma.11G030000	2168229	2168229	A	T
nonsynonymous SNV	Glyma.11G030000	2168243	2168243	T	G
nonsynonymous SNV	Glyma.11G030000	2168434	2168434	G	A
nonsynonymous SNV	Glyma.11G030300	2197172	2197172	C	T
nonsynonymous SNV	Glyma.11G030600	2216496	2216496	C	T
nonsynonymous SNV	Glyma.11G030800	2227055	2227055	T	G
nonsynonymous SNV	Glyma.11G030800	2230107	2230107	A	C
nonsynonymous SNV	Glyma.11G030900	2235068	2235068	C	G
nonsynonymous SNV	Glyma.11G031000	2238123	2238123	G	C
nonframeshift insertion	Glyma.11G031000	2238212	2238212	-	GTATGT
nonsynonymous SNV	Glyma.11G031000	2238154	2238154	T	G
nonsynonymous SNV	Glyma.11G031100	2241188	2241188	A	G
